# Supplementary material for: Alcohol Abuse Associated with Accumulated Periods of Precarious Employment: A Four-Year Follow-Up Study of a Young Population in Korea
Source: MDPI journal article supplement (doi:10.3390/ijerph19127380), 2022-06-16
Supplement: s1 [file s1]

**Supplementary Table S1.** Characteristics of male participants at the baseline (Wave 10) and differences between employment status.

| Characteristics                   | Total [N (%)] | Employment status [N (%)] |             | p-value* |
|-----------------------------------|---------------|---------------------------|-------------|----------|
|                                   |               | Permanent                 | Precarious  |          |
|                                   | 1339 (100)    | 1051 (78.49)              | 288 (21.51) |          |
| <b>Age</b>                        |               |                           |             |          |
| 18–29                             | 939 (70.13)   | 762 (72.5)                | 177 (61.46) | <.001    |
| 30–38                             | 400 (29.87)   | 289 (27.5)                | 111 (38.54) |          |
| <b>Marital status</b>             |               |                           |             |          |
| Married                           | 503 (37.57)   | 425 (40.44)               | 78 (27.08)  | <.001    |
| Other                             | 836 (62.43)   | 626 (59.56)               | 210 (72.92) |          |
| <b>Education level</b>            |               |                           |             |          |
| High school and below             | 299 (22.33)   | 214 (20.36)               | 85 (29.51)  | 0.001    |
| College and above                 | 1040 (77.67)  | 837 (79.64)               | 203 (70.49) |          |
| <b>Weekly working hours</b>       |               |                           |             |          |
| 35–40h                            | 715 (54)      | 588 (56.05)               | 127 (46.18) | 0.008    |
| 40–52h                            | 475 (35.88)   | 364 (34.7)                | 111 (40.36) |          |
| ≥52h                              | 134 (10.12)   | 97 (9.25)                 | 37 (13.45)  |          |
| <b>Income level</b>               |               |                           |             |          |
| <200,000,000 KR Won               | 213 (16.14)   | 117 (11.27)               | 96 (34.04)  | <.0001   |
| ≥200,000,000 KR Won               | 1107 (83.86)  | 921 (88.73)               | 186 (65.96) |          |
| <b>Company size</b>               |               |                           |             |          |
| <100 workers                      | 833 (62.21)   | 627 (59.66)               | 206 (71.53) | <.001    |
| ≥100 workers                      | 506 (37.79)   | 424 (40.34)               | 82 (28.47)  |          |
| <b>Binge drinking<sup>†</sup></b> |               |                           |             |          |
| No                                | 1156 (86.33)  | 908 (86.39)               | 248 (86.11) | 0.902    |
| Yes                               | 183 (13.67)   | 143 (13.61)               | 40 (13.89)  |          |
| <b>Self-rated health</b>          |               |                           |             |          |
| Good                              | 1197 (89.4)   | 945 (89.91)               | 252 (87.5)  | 0.238    |
| Poor                              | 142 (10.6)    | 106 (10.09)               | 36 (12.5)   |          |

\*P values from chi-square tests

<sup>†</sup>Binge drinking was defined as the intake of ≥7 drinks for men or ≥5 drinks for women on a single occasion at least twice a week.

**Supplementary Table S2.** Characteristics of female participants at the baseline (Wave 10) and differences between employment status.

| Characteristics             | Total [N (%)] | Employment status [N (%)] |             | p-value* |
|-----------------------------|---------------|---------------------------|-------------|----------|
|                             |               | Permanent                 | Precarious  |          |
|                             | 719 (100)     | 528 (73.44)               | 191 (26.56) |          |
| <b>Age</b>                  |               |                           |             |          |
| 18–29                       | 408 (56.75)   | 311 (58.9)                | 97 (50.79)  | 0.052    |
| 30–38                       | 311 (43.25)   | 217 (41.1)                | 94 (49.21)  |          |
| <b>Marital status</b>       |               |                           |             |          |
| Married                     | 132 (18.36)   | 98 (18.56)                | 34 (17.8)   | 0.816    |
| Other                       | 587 (81.64)   | 430 (81.44)               | 157 (82.2)  |          |
| <b>Education level</b>      |               |                           |             |          |
| High school and below       | 101 (14.05)   | 66 (12.5)                 | 35 (18.32)  | 0.047    |
| College and above           | 618 (85.95)   | 462 (87.5)                | 156 (81.68) |          |
| <b>Weekly working hours</b> |               |                           |             |          |
| 35–40h                      | 437 (62.97)   | 334 (63.74)               | 103 (60.59) | 0.209    |
| 40–52h                      | 225 (32.42)   | 170 (32.44)               | 55 (32.35)  |          |
| ≥52h                        | 32 (4.61)     | 20 (3.82)                 | 12 (7.06)   |          |
| <b>Income level</b>         |               |                           |             |          |
| <200,000,000 KR Won         | 301 (42.94)   | 196 (37.91)               | 105 (57.07) | <.0001   |

|                                   |             |             |             |       |
|-----------------------------------|-------------|-------------|-------------|-------|
| ≥200,000,000 KR Won               | 400 (57.06) | 321 (62.09) | 79 (42.93)  |       |
| <b>Company size</b>               |             |             |             |       |
| <100 workers                      | 480 (66.76) | 345 (65.34) | 135 (70.68) | 0.180 |
| ≥100 workers                      | 239 (33.24) | 183 (34.66) | 56 (29.32)  |       |
| <b>Binge drinking<sup>†</sup></b> |             |             |             |       |
| No                                | 673 (93.60) | 493 (93.37) | 121 (94.24) | 0.674 |
| Yes                               | 46 (6.40)   | 35 (6.63)   | 11 (5.76)   |       |
| <b>Self-rated health</b>          |             |             |             |       |
| Good                              | 620 (86.23) | 460 (87.12) | 160 (83.77) | 0.249 |
| Poor                              | 99 (13.77)  | 68 (12.88)  | 31 (16.23)  |       |

\*P values from chi-square tests

<sup>†</sup>Binge drinking was defined as the intake of ≥7 drinks for men or ≥5 drinks for women on a single occasion at least twice a week.

**Supplementary Table S3.** Logistic regression models for CAGE ≥1 as a screen for alcohol use disorders according to PE.

|                               | N (%) <sup>a</sup> | Crude            | Model 1 <sup>b</sup> | Model 2 <sup>b</sup> |
|-------------------------------|--------------------|------------------|----------------------|----------------------|
| <b>Total</b>                  | 118/1360 (8.68)    |                  |                      |                      |
| Full-time permanent sustained | 59/873 (6.76)      | 1.00 (reference) | 1.00 (reference)     | 1.00 (reference)     |
| PE for 1 year                 | 20/154 (12.99)     | 2.06 (1.20–3.53) | 2.07 (1.21–3.54)     | 2.13 (1.24–3.69)     |
| PE for 2–4 years              | 39/333 (11.71)     | 1.83 (1.20–2.80) | 1.84 (1.20–2.82)     | 1.85 (1.20–2.86)     |
| <b>Men</b>                    | 87/955 (9.11)      |                  |                      |                      |
| Full-time permanent sustained | 44/619 (7.11)      | 1.00 (reference) | 1.00 (reference)     | 1.00 (reference)     |
| PE for 1 year                 | 15/110 (13.64)     | 2.08 (1.11–3.89) | 2.11 (1.13–3.94)     | 2.29 (1.21–4.32)     |
| PE for 2–4 years              | 28/226 (12.39)     | 1.95 (1.18–3.23) | 1.92 (1.16–3.17)     | 1.95 (1.16–3.27)     |
| <b>Women</b>                  | 31/405 (7.65)      |                  |                      |                      |
| Full-time permanent sustained | 15/254 (5.91)      | 1.00 (reference) | 1.00 (reference)     | 1.00 (reference)     |
| PE for 1 year                 | 5/44 (11.36)       | 2.04 (0.70–5.94) | 1.92 (0.65–5.64)     | 1.78 (0.60–5.30)     |
| PE for 2–4 years              | 11/107 (10.28)     | 1.83 (0.81–4.12) | 1.87 (0.82–4.25)     | 1.79 (0.78–4.08)     |

PE: precarious employment. <sup>a</sup>Model 1 adjusted for age group and at baseline. <sup>b</sup>Model 2 adjusted for age group, education level, and self-rated health at baseline.

\* Proportion of new cases of alcohol use disorders defined based on CAGE ≥1 at Wave 13 of YP2007.
